# Supplementary material for: Neurite outgrowth is driven by actin polymerization even in the presence of actin polymerization inhibitors
Source: PubMed Central journal article supplement — Mol Biol Cell. 2016 Nov 15;27(23):3695–704. doi: 10.1091/mbc.E16-04-0253 (PMC5170553; doi:10.1091/mbc.e16-04-0253), 2016-11-15
Supplement: supp_E16-04-0253v1_CombinedSupMats.pdf [file supp_E16-04-0253v1_CombinedSupMats.pdf]

# Supplemental Materials

*Molecular Biology of the Cell*

Chia et al.
